# Supplementary material for: Inflammatory pain resolution by mouse serum-derived small extracellular vesicles
Source: PubMed Central journal article supplement — bioRxiv. 2024 Feb 18:2024.02.16.578759. Preprint. [Version 1] doi: 10.1101/2024.02.16.578759 (PMC10888877; doi:10.1101/2024.02.16.578759), 2024-02-18

Supplementary Fig. 1

10 $\mu$ g naïve sEVs  
6h post injection

Neuron (SC)

Astrocyte (SC)

Microglia/Macrophage (SC)

Macrophage (DRG)

**MAP2A**

**GFAP**

**IBA1**

**IBA1**

**Cell marker**

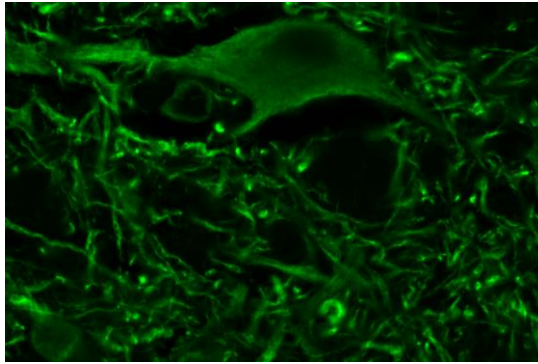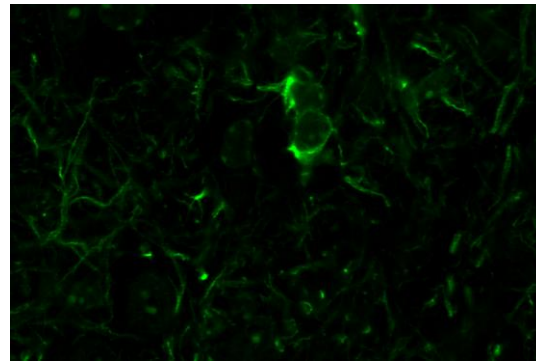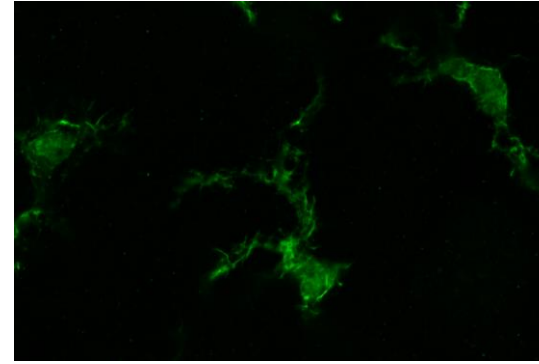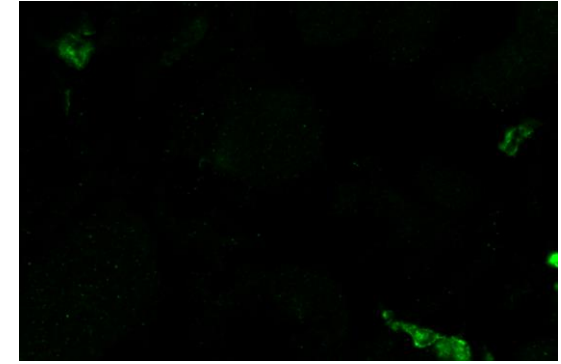

**PKH26 sEVs**

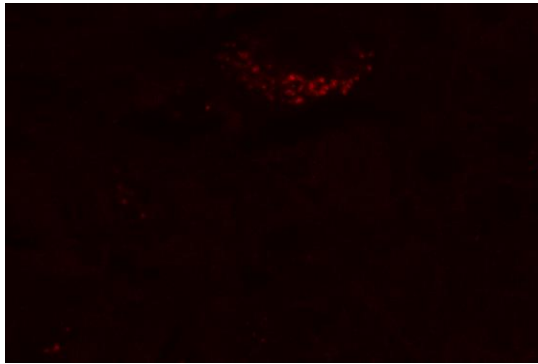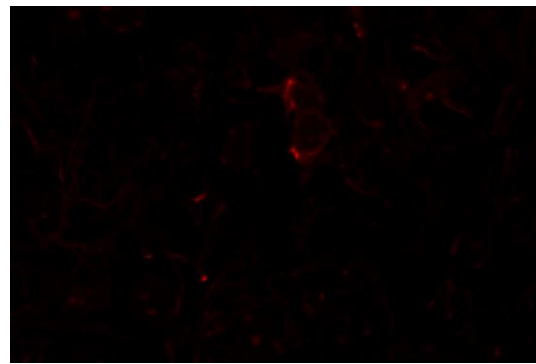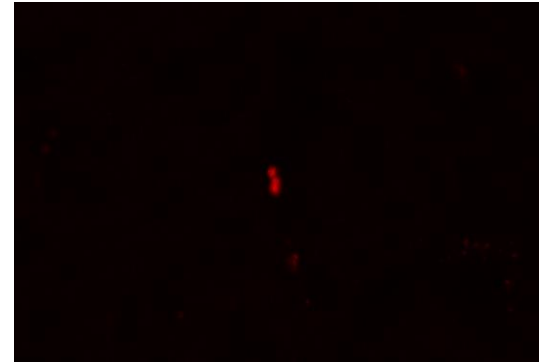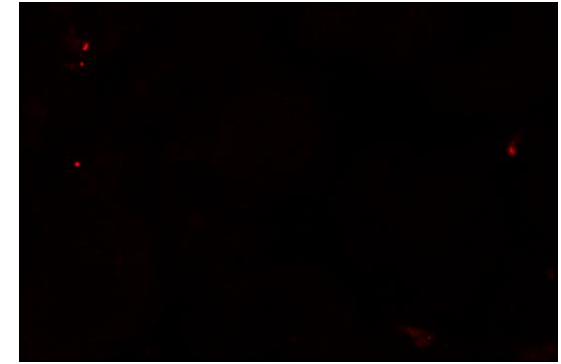

**Merge**

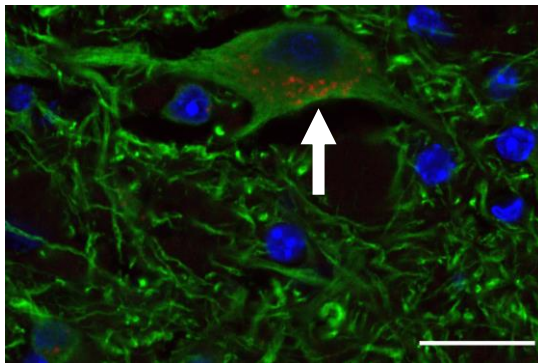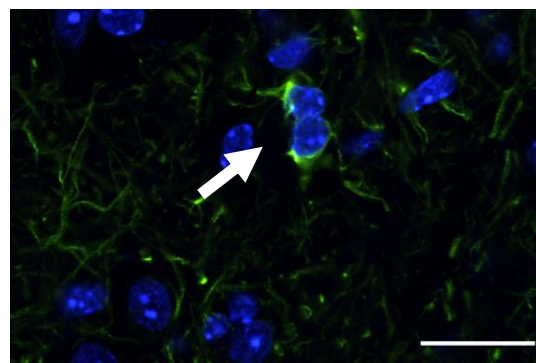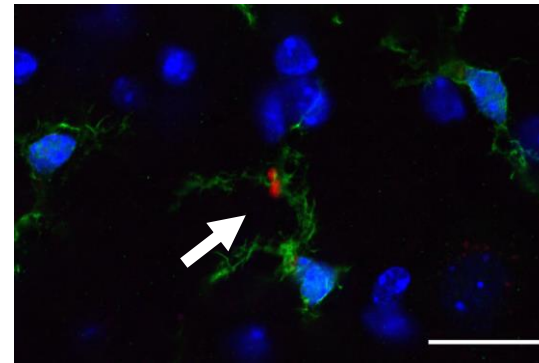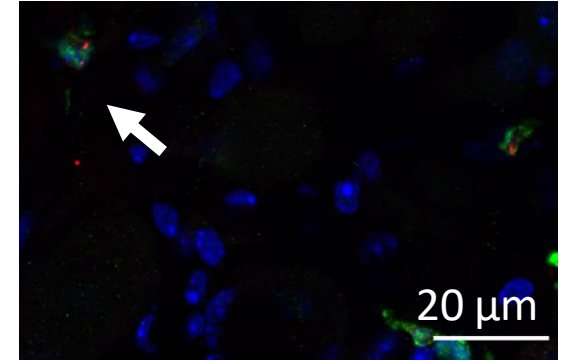

# Supplementary Fig. 2

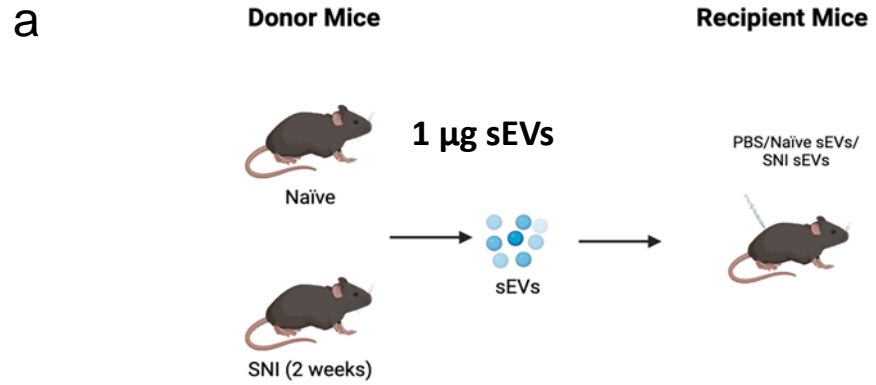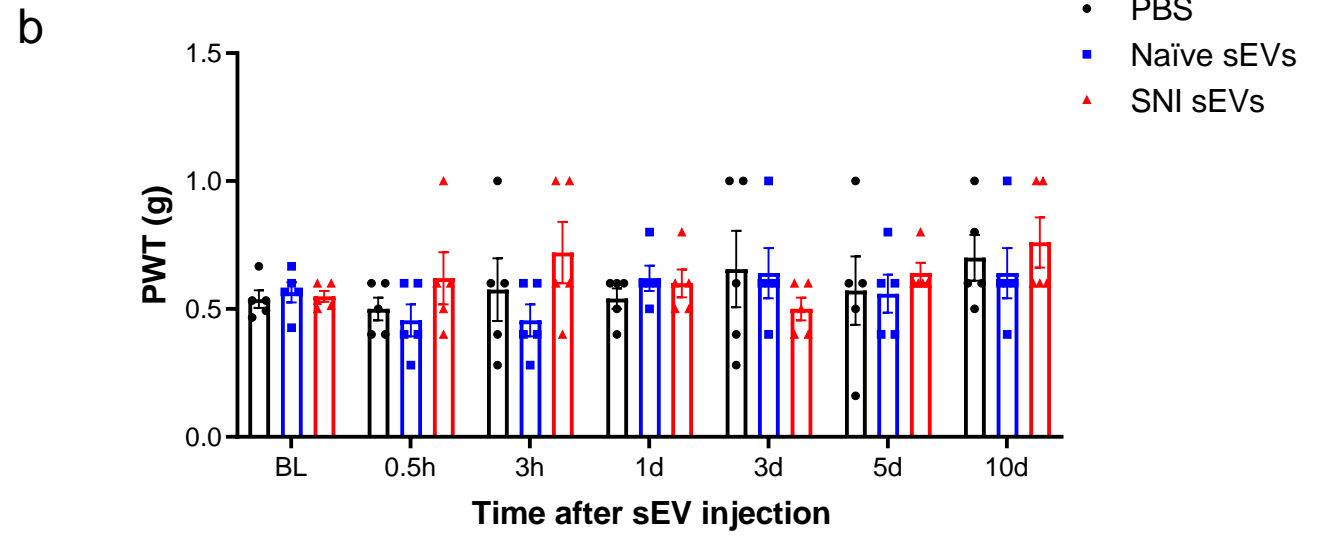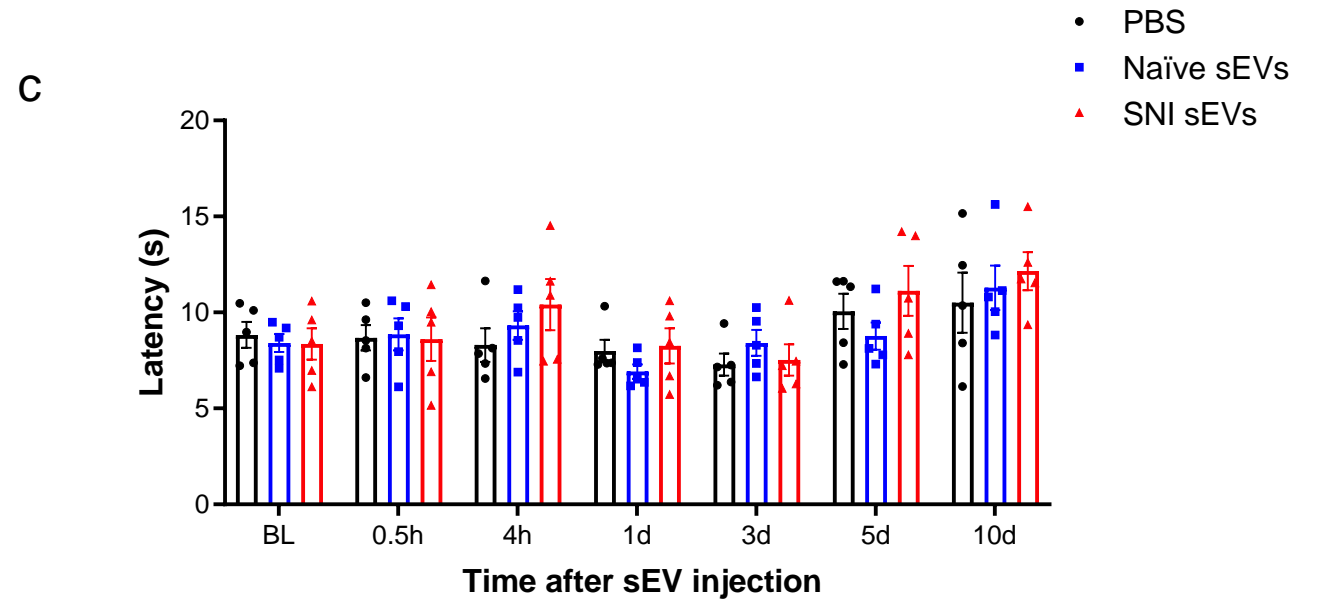

Supplementary Fig. 3

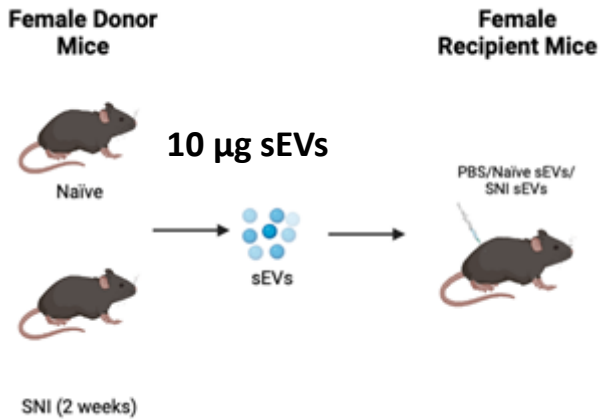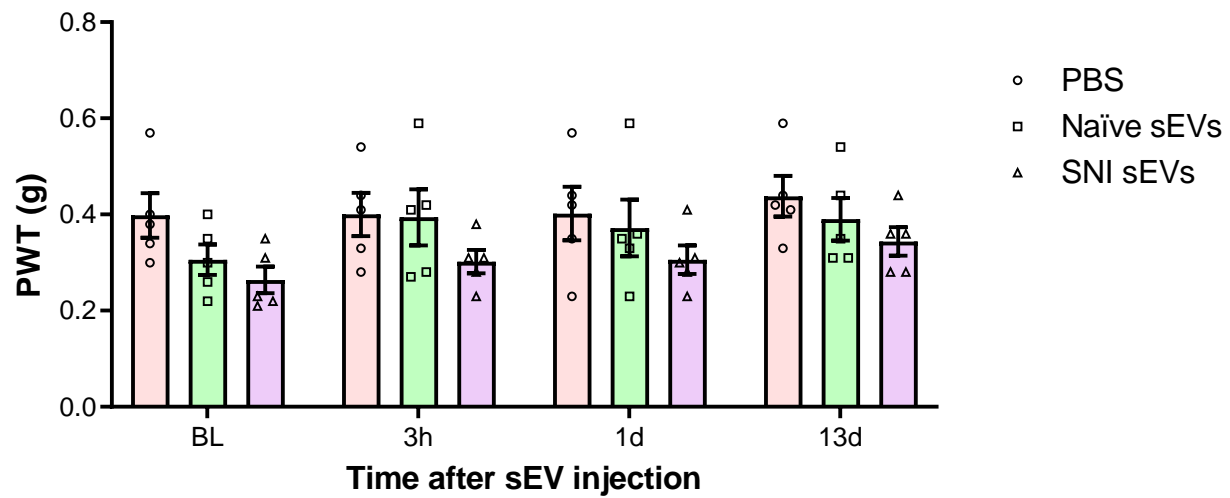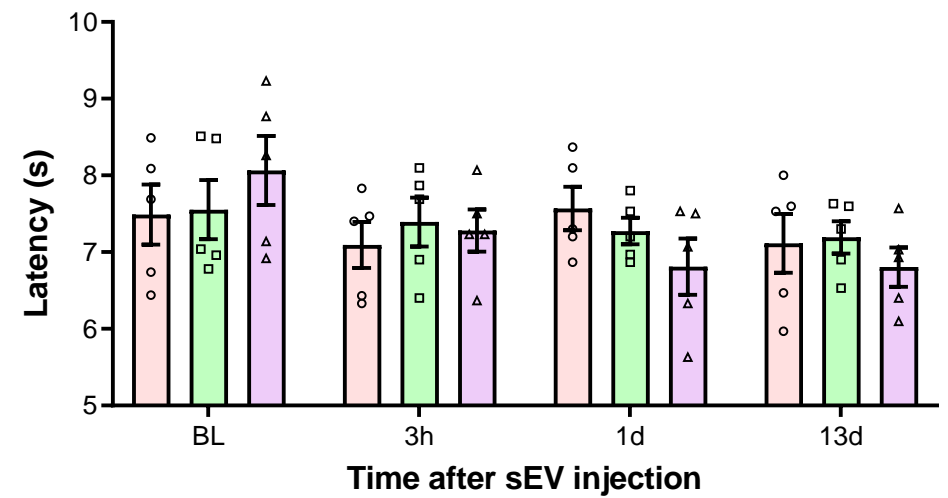

Supplementary Fig. 4

a

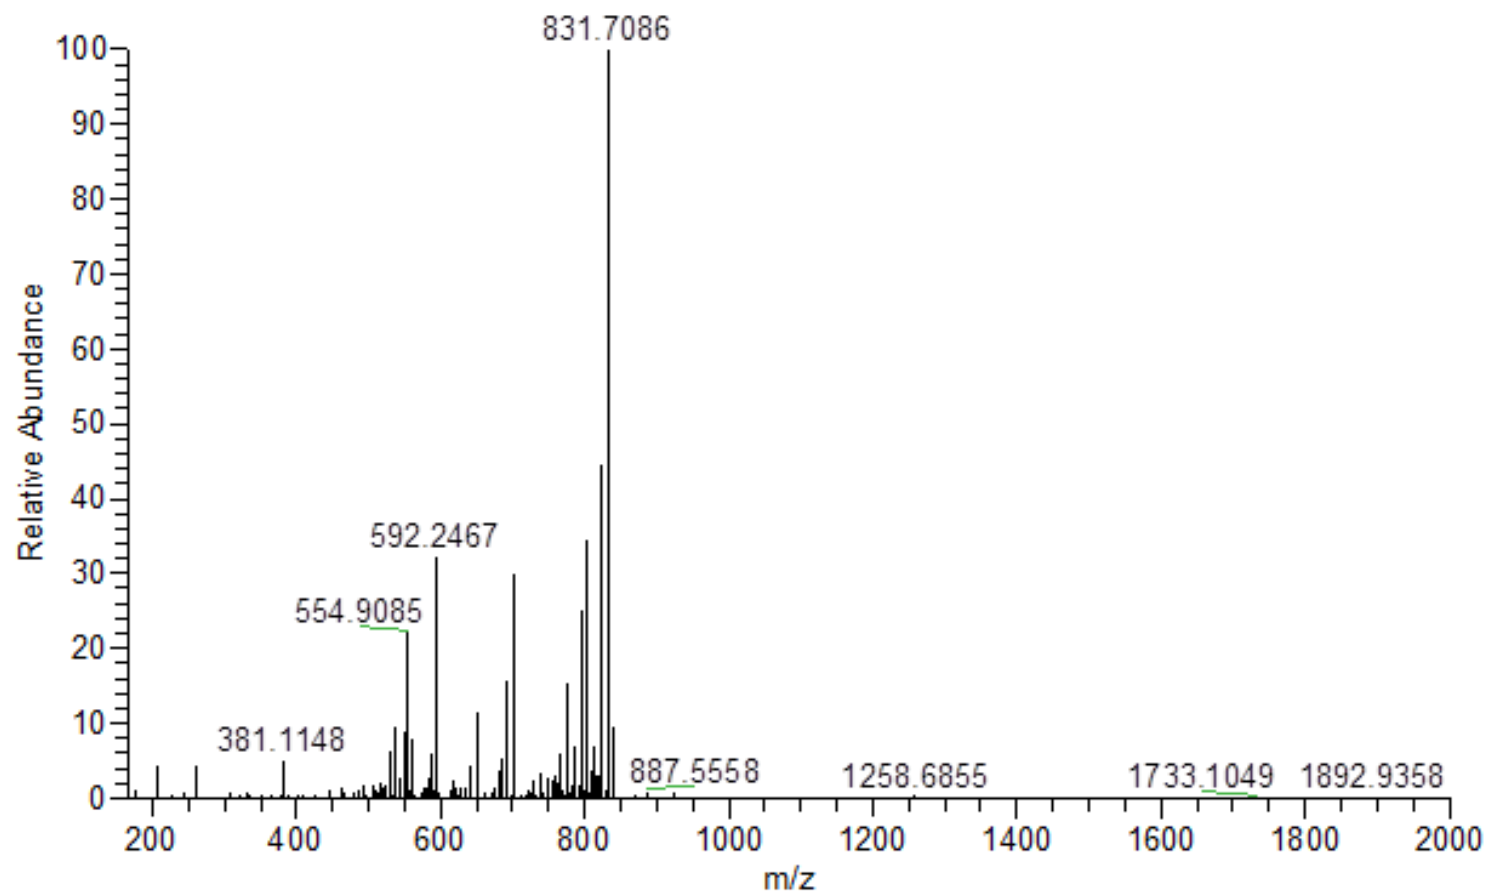

Supplementary Fig. 5a

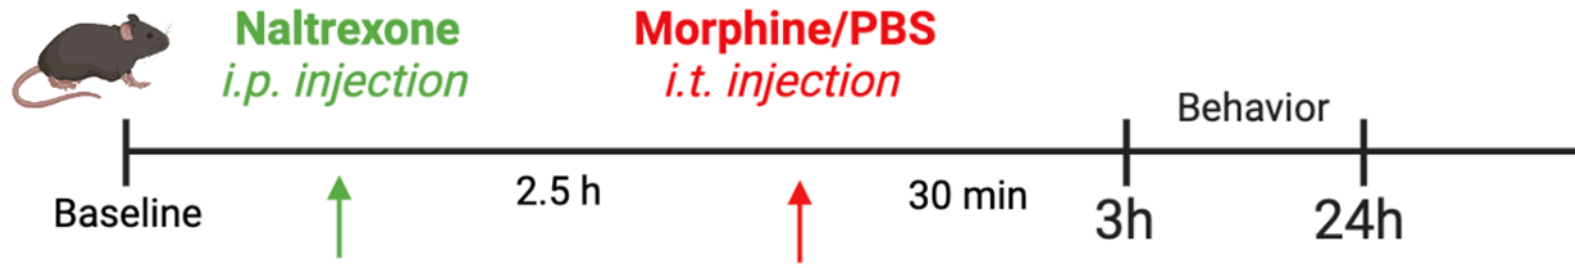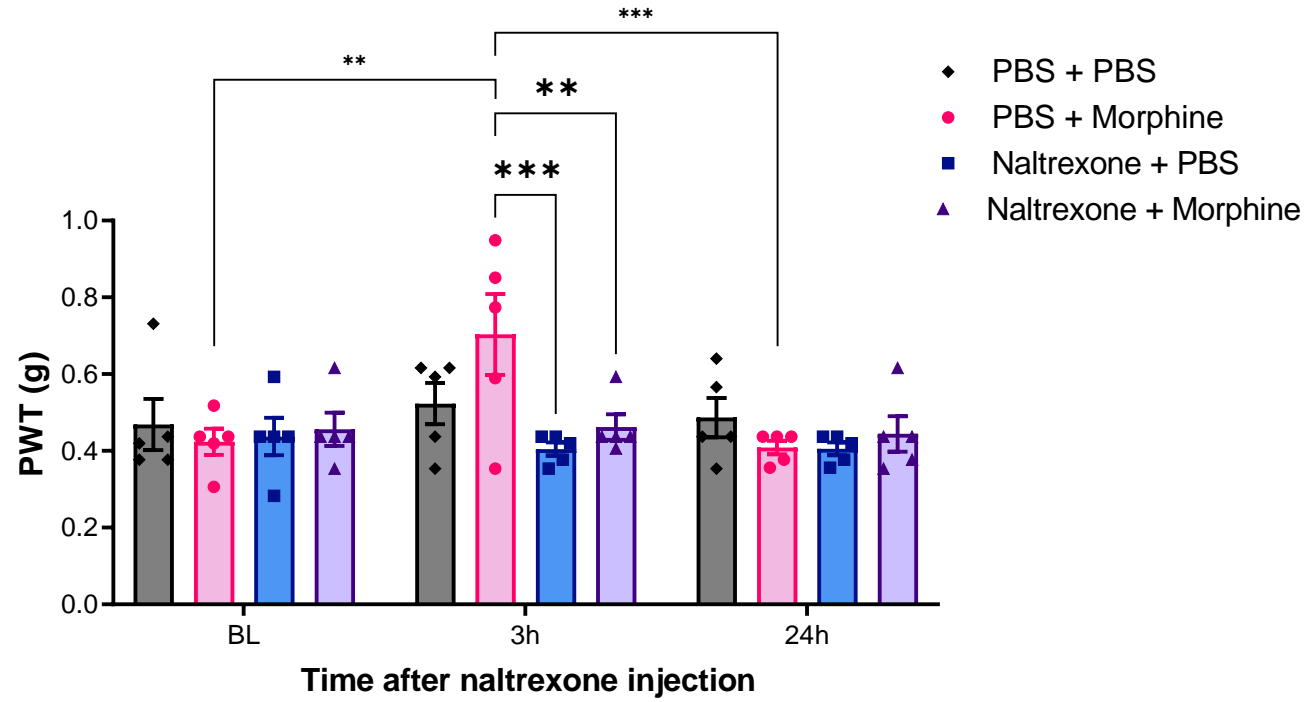

Supplementary Fig. 5b

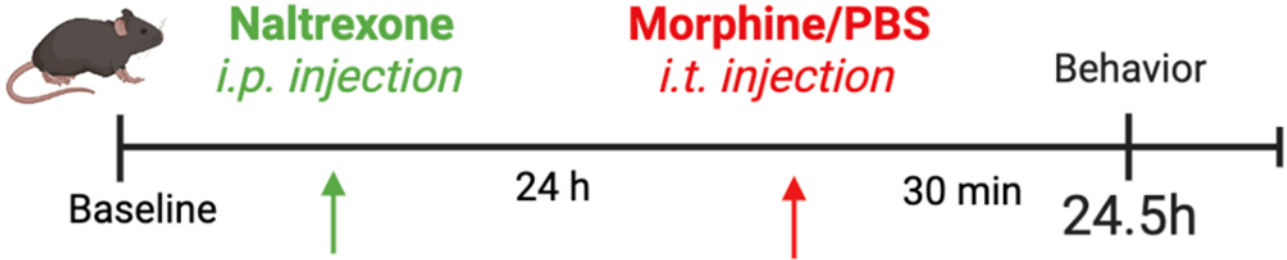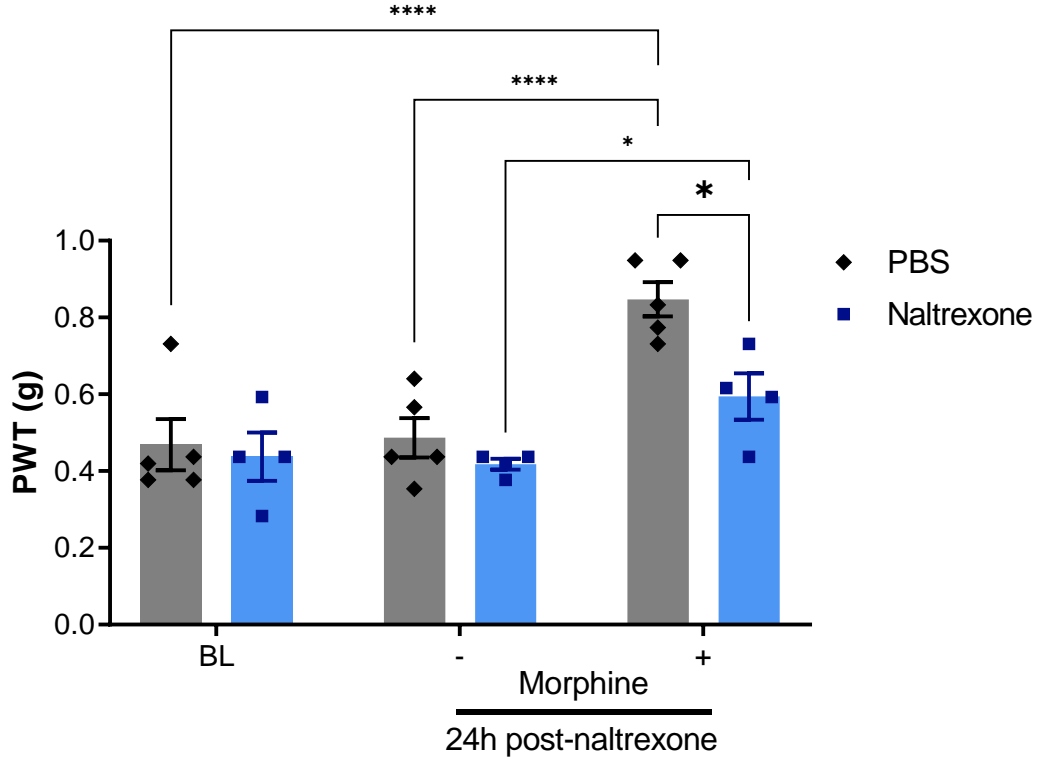

# Supplementary Fig. 6

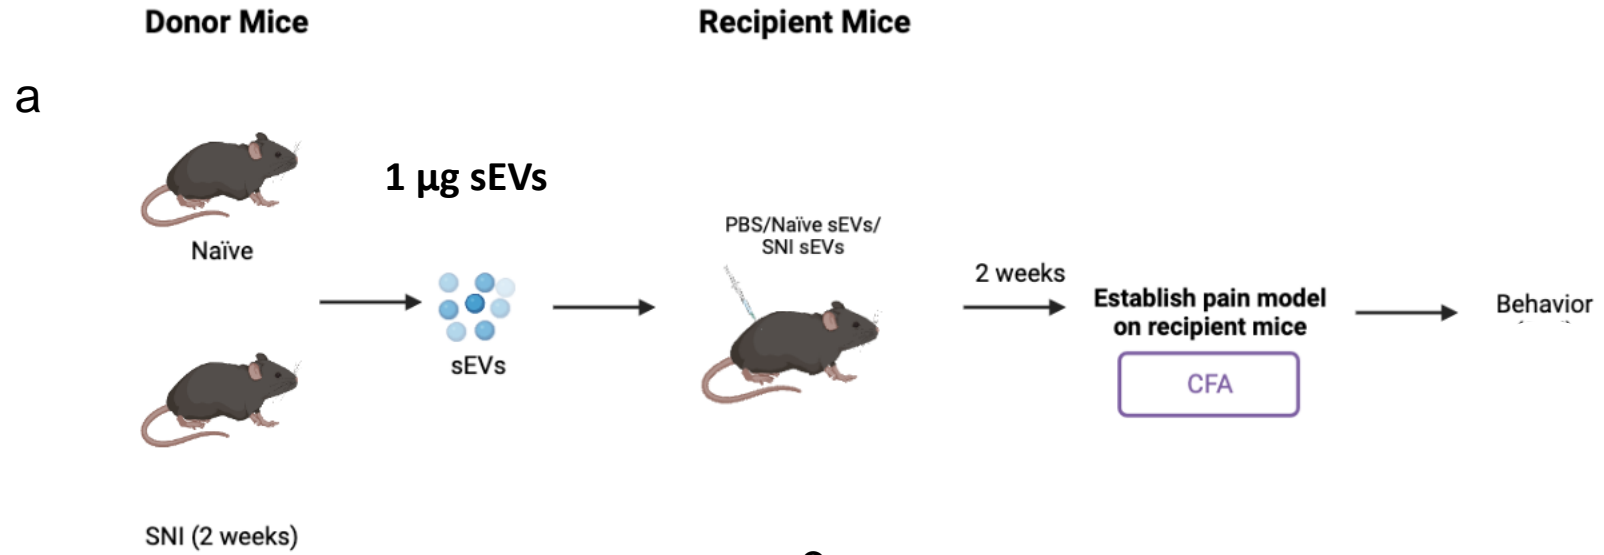

**b**

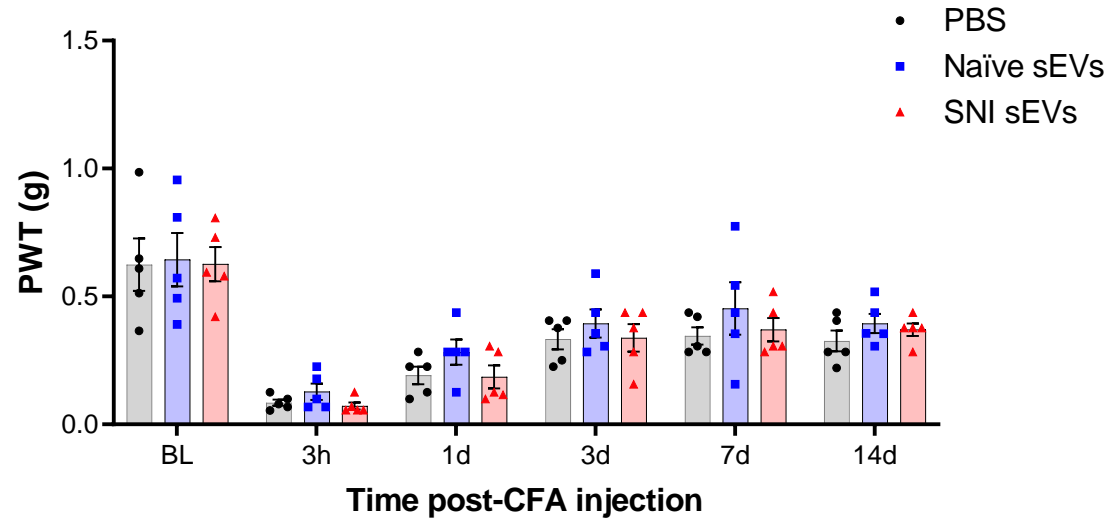

**c**

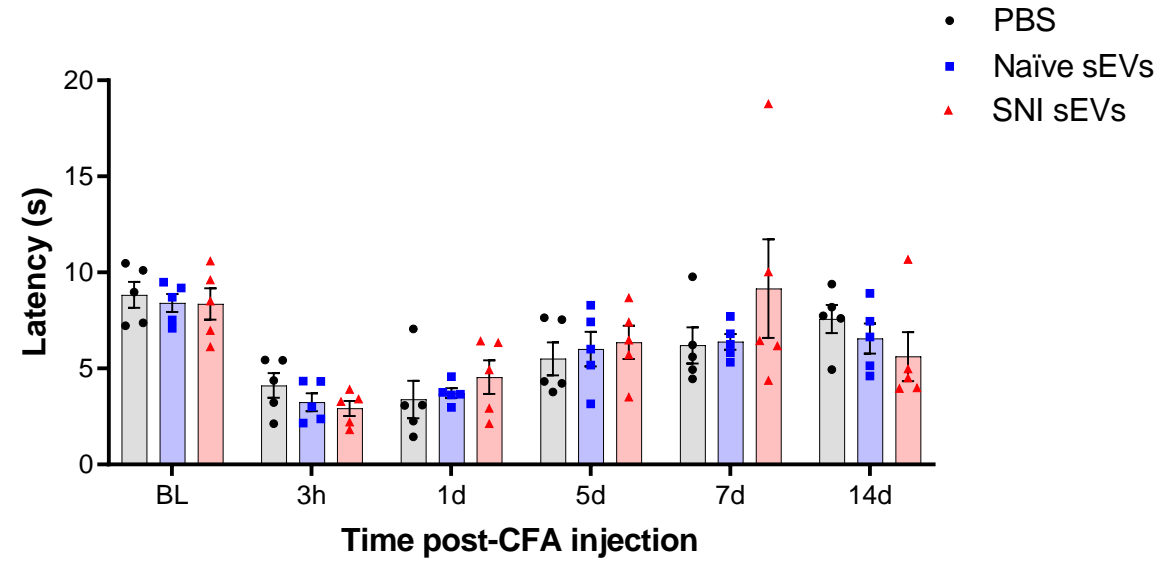

Supplementary Fig. 7

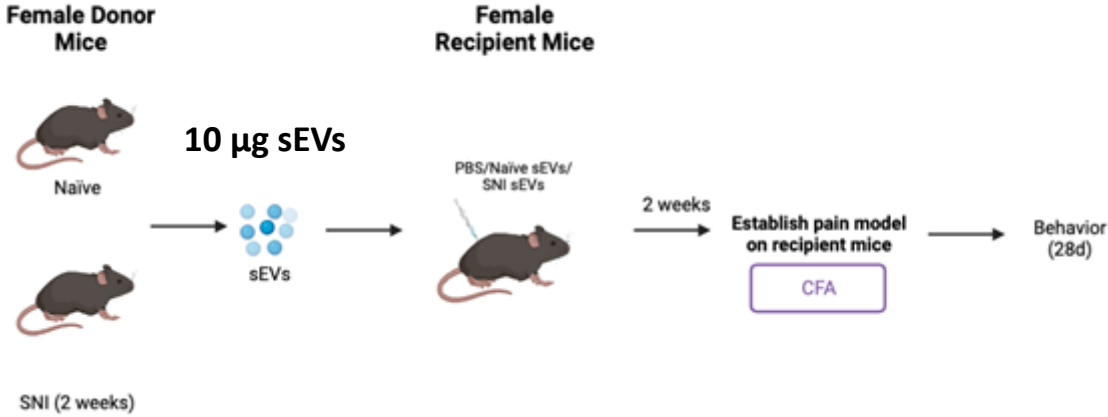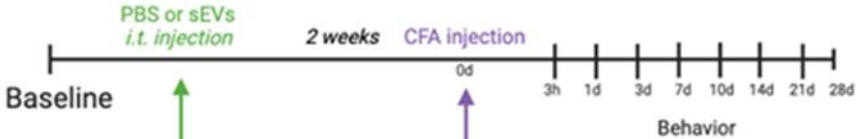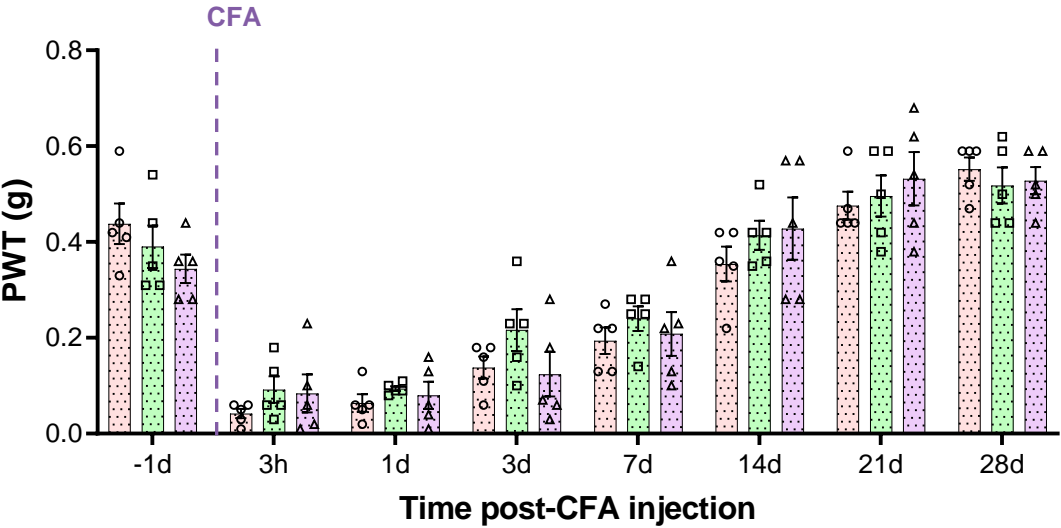

- PBS
- Naive sEVs
- △ SNI sEVs

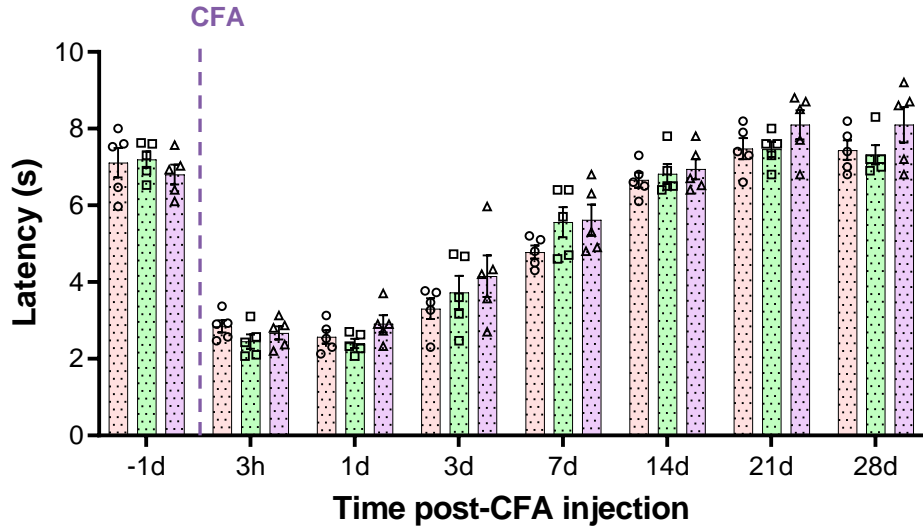



# Supplementary Fig. 8

## Total cells

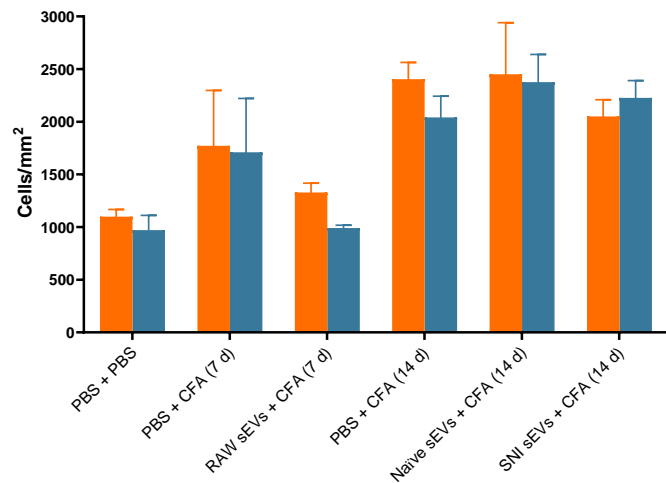

## SC ipsi/contra

Ipsi  
Contra

## Immune cells

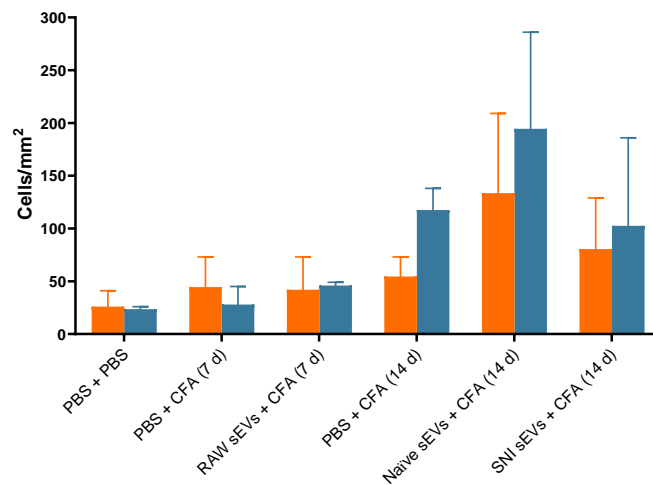

## T cells

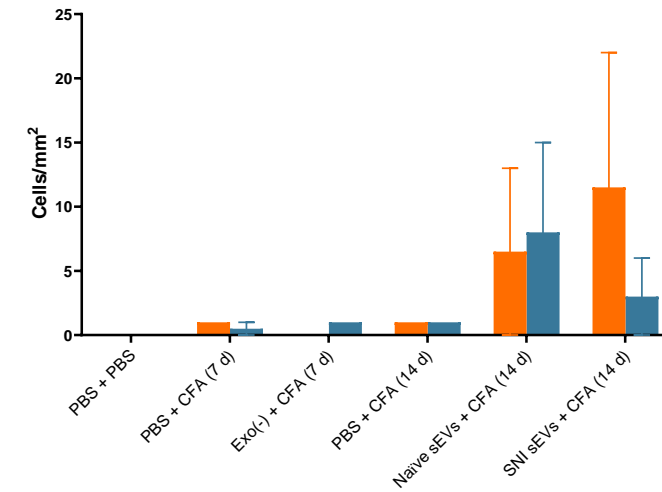

## NK T cells

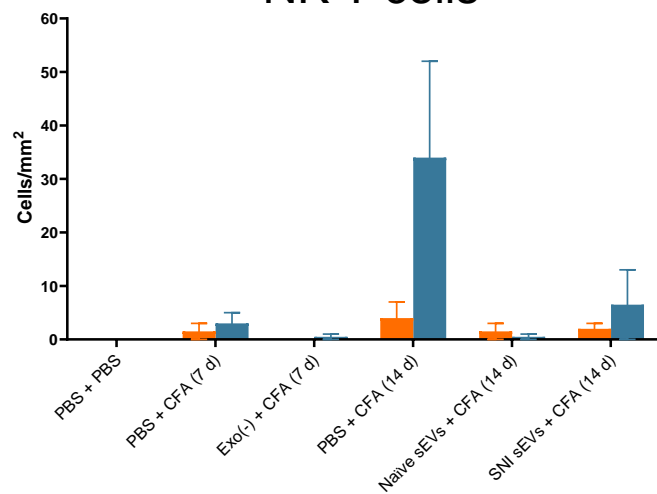

## NK cells

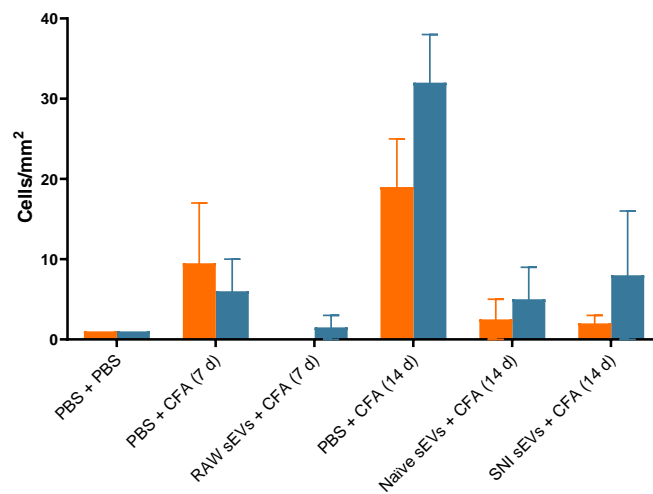

## B cells

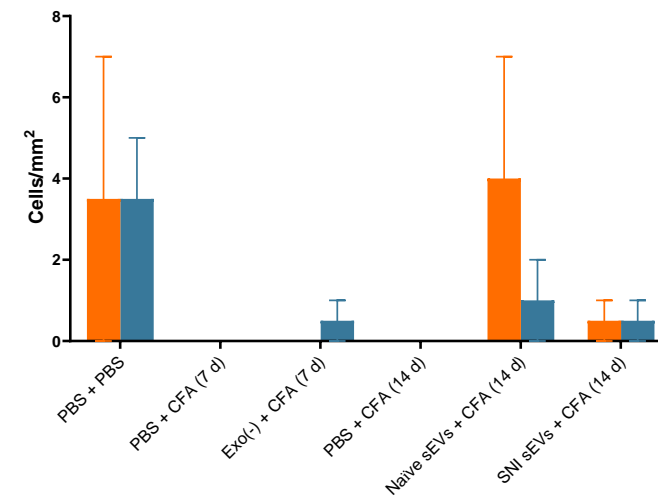

### Macrophages

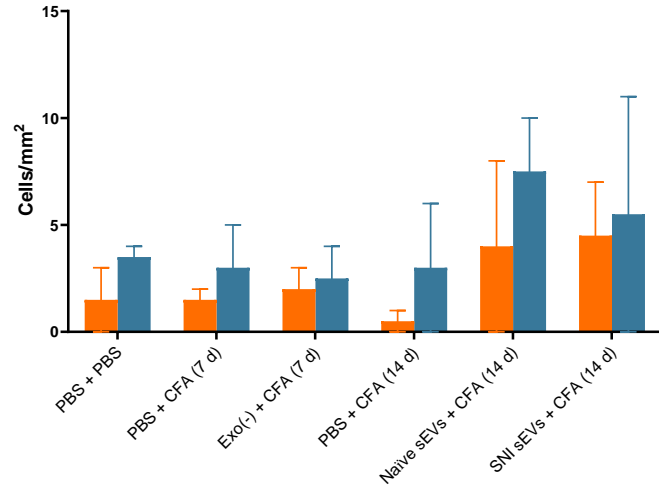

### M2 macrophages

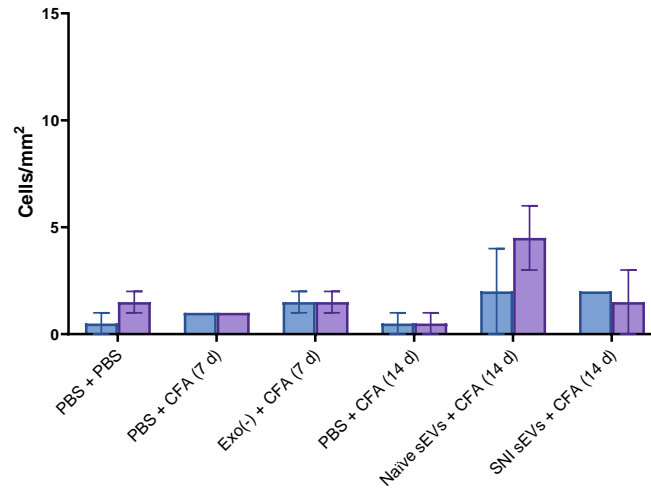

### Neutrophils

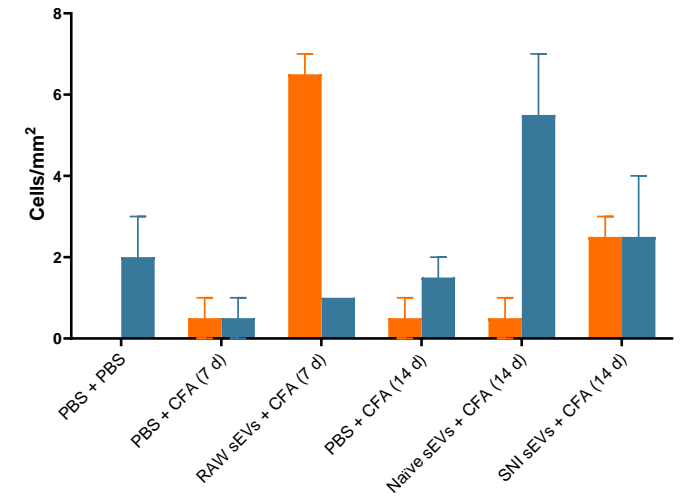

### M2 macrophages

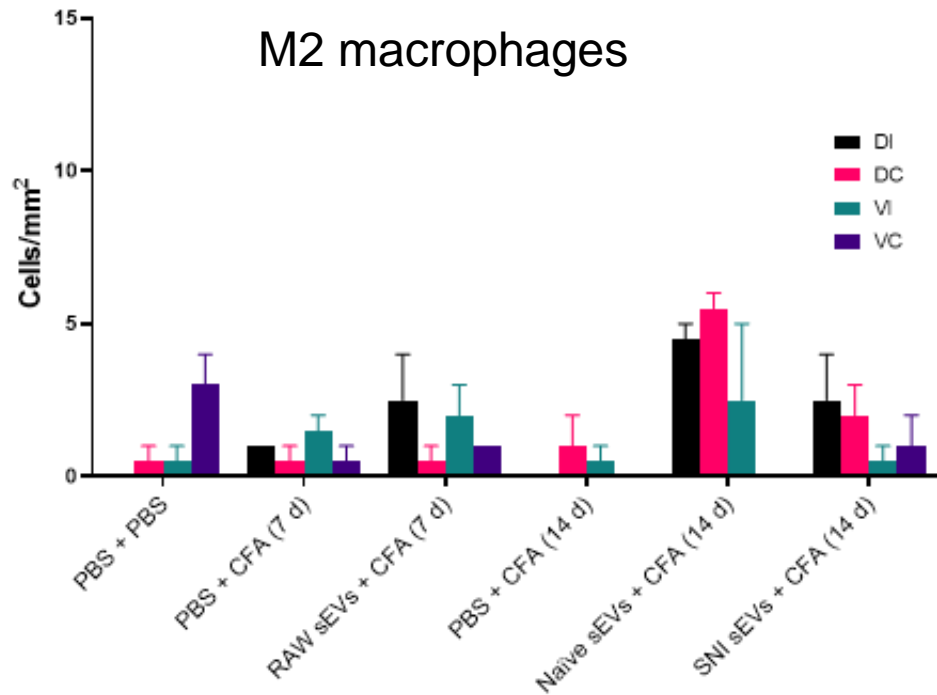

### Neutrophils

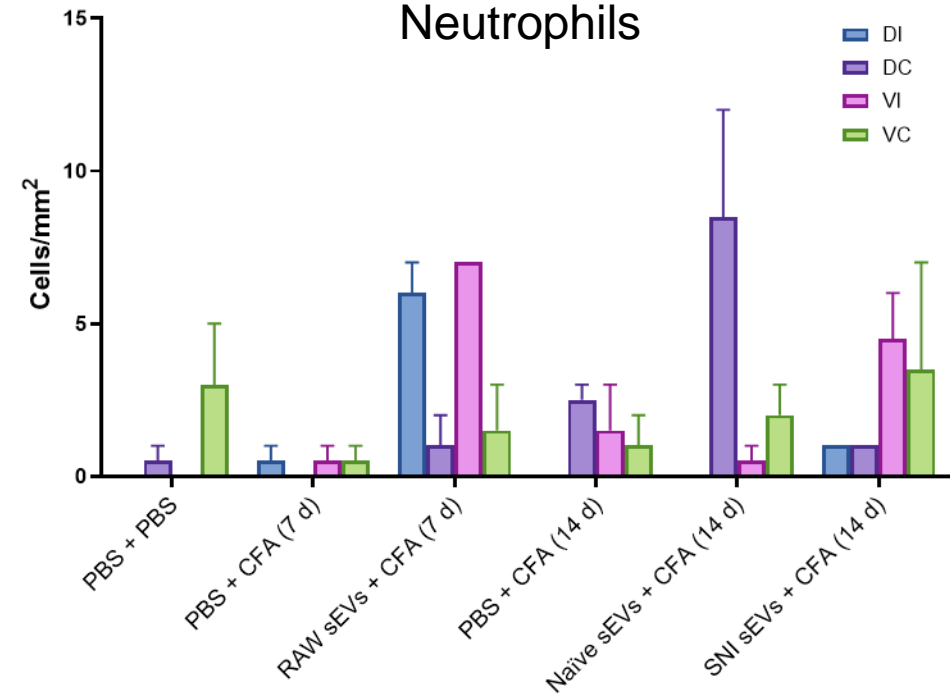

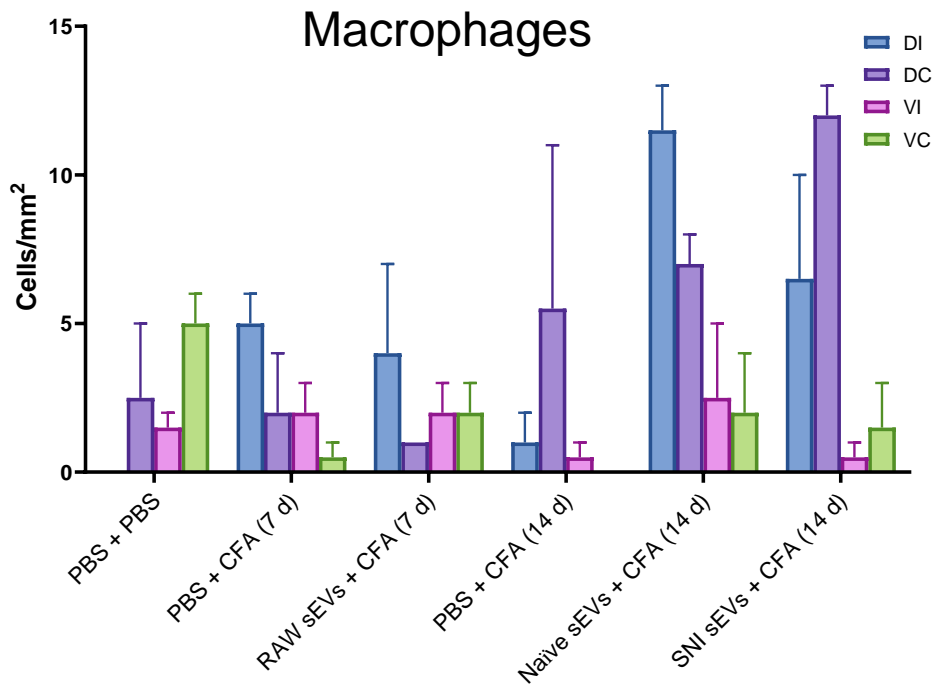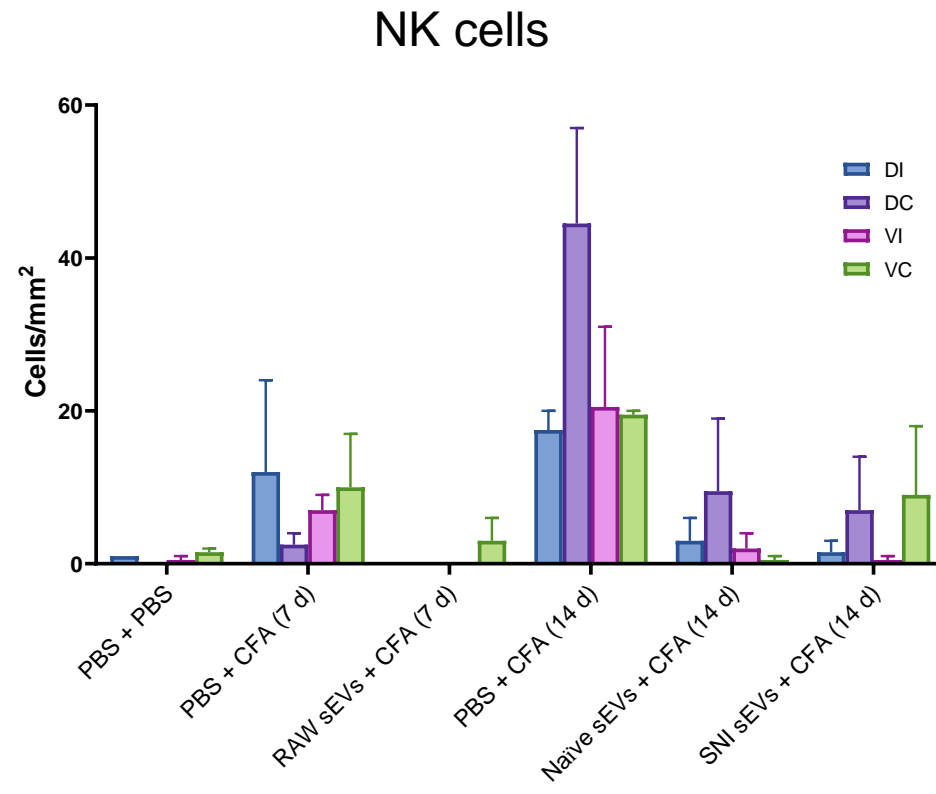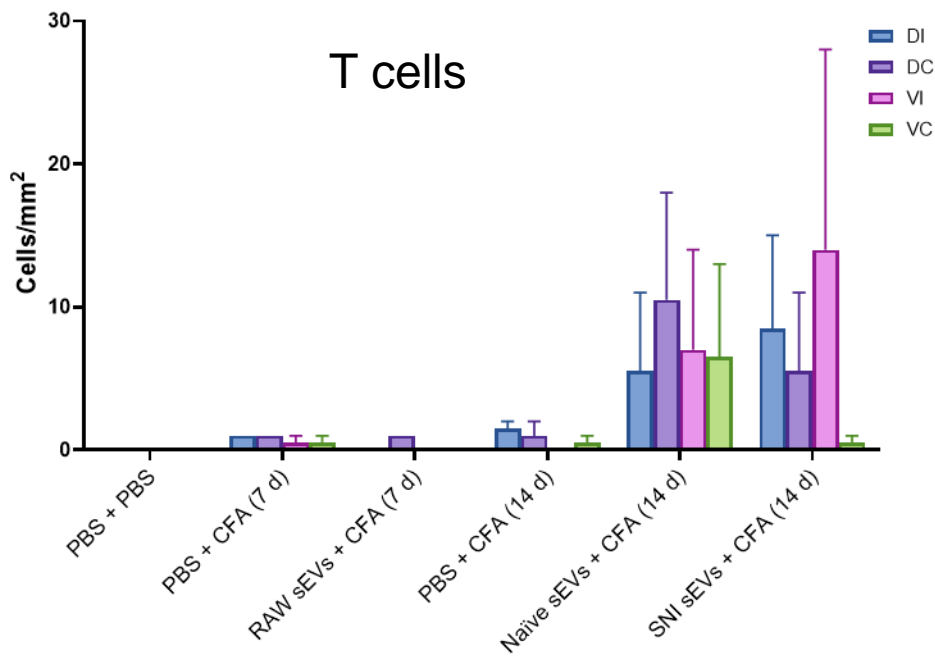

**a** **Detector antibody fluorescence intensity**

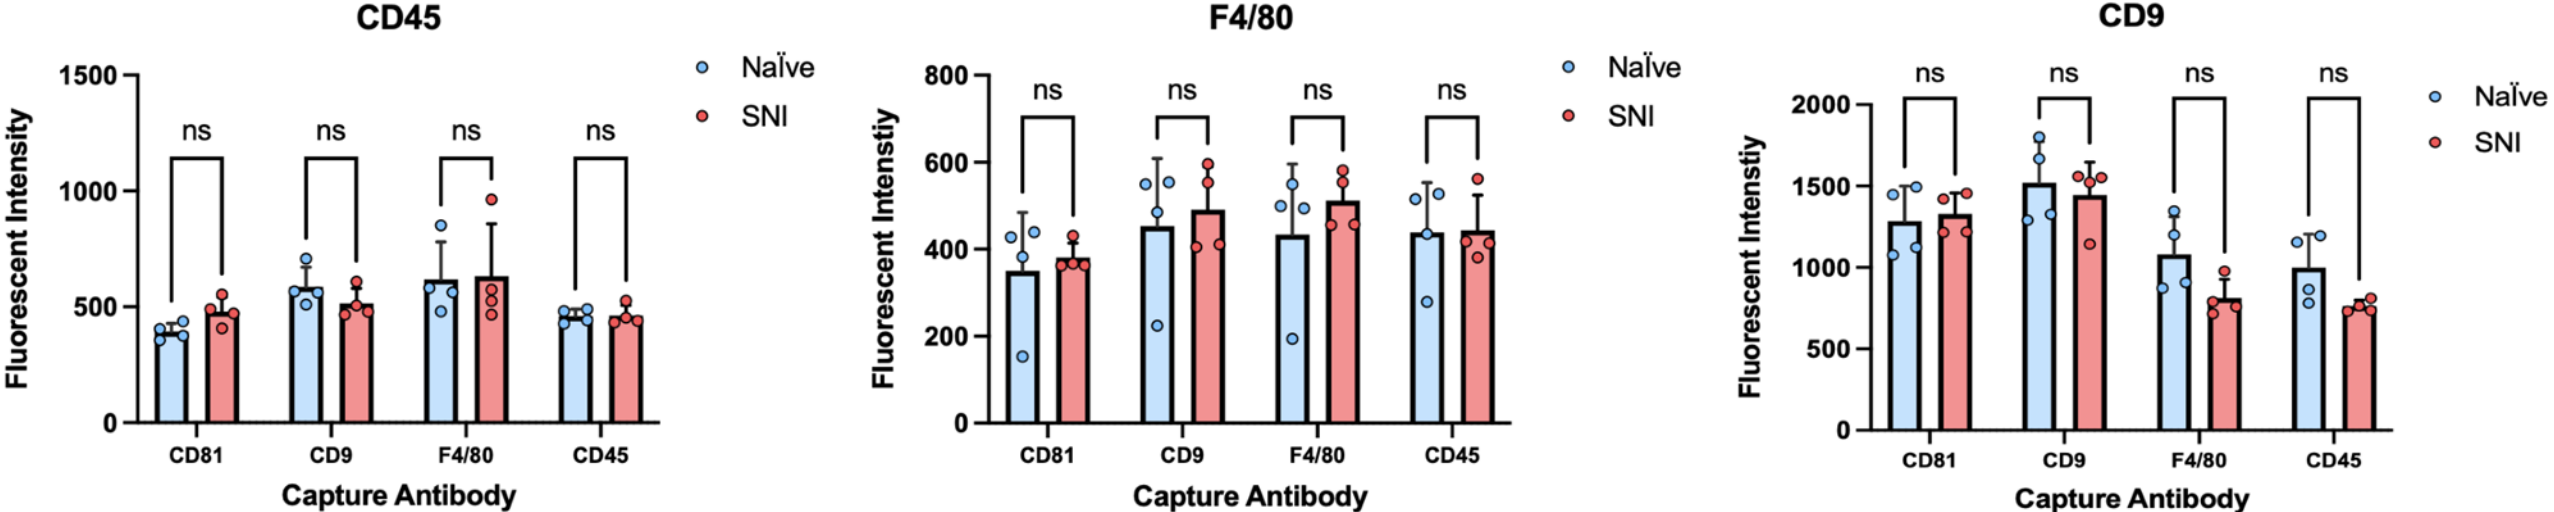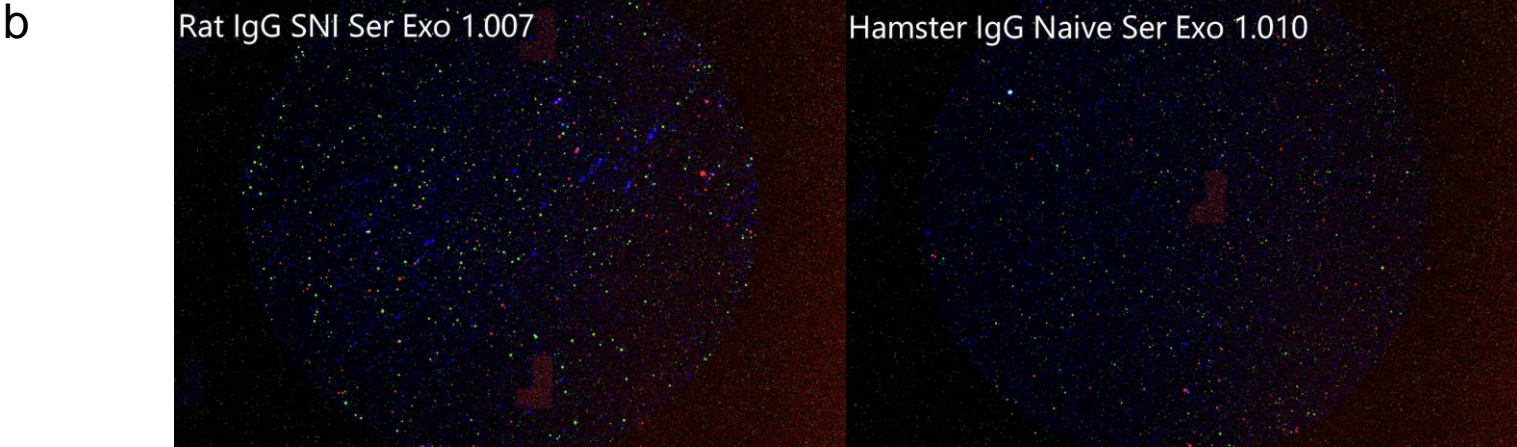

Supplementary Fig. 10

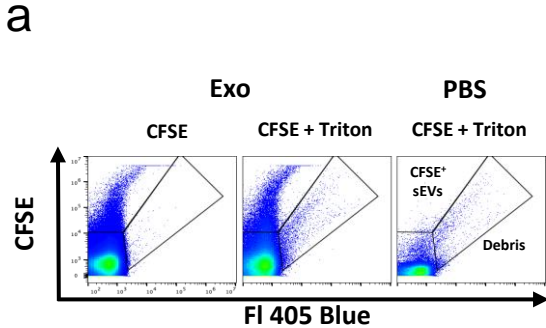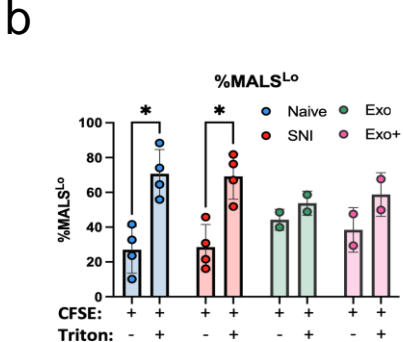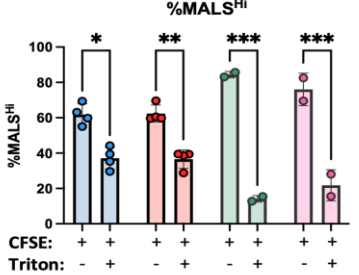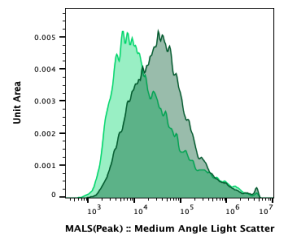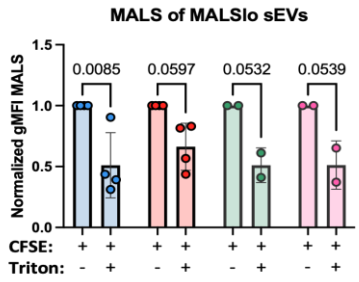

Supplement: media-1.pdf [file media-1.pdf]
