# Supplementary material for: Inflammatory pain resolution by mouse serum-derived small extracellular vesicles
Source: PubMed Central journal article supplement — bioRxiv. 2024 Feb 18:2024.02.16.578759. Preprint. [Version 1] doi: 10.1101/2024.02.16.578759 (PMC10888877; doi:10.1101/2024.02.16.578759), 2024-02-18
Supplement: media-5.pdf [file media-5.pdf]

## Supplementary Table 4

| # | L4-L5 spinal cord and DRG from recipient male mice                     |
|---|------------------------------------------------------------------------|
| 1 | Naïve control                                                          |
| 2 | PBS ( <i>i.t.</i> ) + 7 days post CFA                                  |
| 3 | sEVs from RAW 264.7 macrophage cells ( <i>i.t.</i> ) + 7 days post CFA |
| 4 | PBS ( <i>i.t.</i> ) + 14 days post CFA                                 |
| 5 | sEVs from naïve donor mice ( <i>i.t.</i> ) + 14 days post CFA          |
| 6 | sEVs from SNI model (2 wks post SNI; <i>i.t.</i> ) + 14 days post CFA  |

**Supp Table 4** Experimental design showing treatment groups in recipient mice. L4-L5 spinal cord and DRG from recipient male mice were obtained at time points that were most efficacious in behavior testing (n=2). sEVs from RAW 264.7 were included as a positive control for homogenous sEV source of macrophage under culture conditions.

## Supplementary Table 5

| Population                 | Marker definition                       |
|----------------------------|-----------------------------------------|
| Immune cells               | CD45+                                   |
| T cells                    | CD45+CD3+CD335-                         |
| CD4+T cells                | CD45+CD3+CD335-CD4+CD8-                 |
| CD8+T cells                | CD45+CD3+CD335-CD4-CD8+                 |
| T reg                      | CD45+CD3+CD335-CD4+CD8-FOXP3+           |
| Activated T cells          | CD45+CD3+CD335-MHCII+                   |
| NKT cells                  | CD45+CD3+CD335+                         |
| NK cells                   | CD45+CD3-CD335+                         |
| Activated NK cells         | CD45+CD3-CD335+MHCII+                   |
| B cells                    | CD45-CD3-CD335-B220+CD19+               |
| Monocytes /Macrophages     | CD45+CD3-CD335-CD11c-F4/80+CD11b+       |
| M2 macrophages             | CD45+CD3-CD335-CD11c-F4/80+CD11b+CD206+ |
| Neutrophils                | CD45+CD3-CD335-F4/80-CD11b+Gr1+         |
| Proliferating immune cells | CD45+Ki67+                              |
| Neurons                    | NeuN+                                   |
| Microglia                  | CD45+CD3-CD335-F4/80-CD11b+TMEM119+     |

**Supp Table 5** The 16-plex panel of markers used to identify the populations in ChipCytometry
